# Supplementary material for: The Umbelopsis ramanniana Sensu Lato Consists of Five Cryptic Species
Source: MDPI journal article supplement (doi:10.3390/jof8090895), 2022-08-23
Supplement: s1 [file s1]

**Table S2.** Maximum growth temperature (°C) of strains in the *Umbelopsis ramanniana* complex.

|                                               |    |               |    |               |    |
|-----------------------------------------------|----|---------------|----|---------------|----|
| <b>C1: <i>U. curvata</i> [35–36]</b>          |    |               |    |               |    |
| CGMCC 3.6647                                  | 35 | CGMCC 3.6648  | 36 | CBS 219.47    | 35 |
| <b>C2: <i>U. ramanniana</i> [33–35 (–36)]</b> |    |               |    |               |    |
| CGMCC 3.6646                                  | 33 | CGMCC 3.15772 | 33 | CGMCC 3.15773 | 33 |
| CGMCC 3.15774                                 | 33 | CGMCC 3.15775 | 33 | CGMCC 3.15776 | 33 |
| CGMCC 3.15783                                 | 36 | CGMCC 3.15784 | 34 | CGMCC 3.15785 | 35 |
| CGMCC 3.15786                                 | 35 | CGMCC 3.16356 | 35 |               |    |
| <b>C3: <i>U. microsporangia</i> [31–32]</b>   |    |               |    |               |    |
| CGMCC 3.15769                                 | 31 | CGMCC 3.15770 | 32 | CGMCC 3.15771 | 32 |
| CGMCC 3.15782                                 | 32 |               |    |               |    |
| <b>C4: <i>U. dura</i> [35]</b>                |    |               |    |               |    |
| CGMCC 3.15777                                 | 35 | CGMCC 3.15778 | 35 | CGMCC 3.15779 | 35 |
| CGMCC 3.15780                                 | 35 | CGMCC 3.15781 | 35 |               |    |
| <b>C5: <i>U. oblongielliptica</i> [37]</b>    |    |               |    |               |    |
| NRRL 1296                                     | 37 |               |    |               |    |
| <b>C6: <i>U. macrospora</i> [38]</b>          |    |               |    |               |    |
| NRRL 5844                                     | 38 |               |    |               |    |
